# Supplementary material for: FRET studies of a landscape of Lac repressor-mediated DNA loops
Source: PubMed Central journal article supplement — Nucleic Acids Res. 2012 Feb 4;40(10):4432–45. doi: 10.1093/nar/gks019 (PMC3378866; doi:10.1093/nar/gks019), 2012-02-04
Supplement: supp_gks019_nar-01170-f-2011-File008.pdf [file supp_gks019_nar-01170-f-2011-File008.pdf]

## **Supplementary Materials for Haeusler et al., “FRET Studies of a Landscape of Lac Repressor Mediated DNA Loops,” *Nucleic Acids Research*.**

### *LacI Expression and Purification*

Protein expression and purification was adapted from published work (1,2), unpublished changes by Laurence Edelman, and additional modifications. LacI was expressed in *E. coli* BL21(DE3) pLysS previously transformed with pETLE1a, a plasmid that contains the LacI gene and ampicillin resistance. Cells were grown from a single colony in a 1 mL LB starter culture overnight, then added to 1 L of LB media containing 50  $\mu\text{g}/\text{mL}$  of both ampicillin and chloramphenicol for a 2 hr growth at 37 °C. The cells were then induced with 0.1 mM IPTG and an additional 50  $\mu\text{g}/\text{mL}$  of ampicillin. Growth was continued for 3 hrs, after which cells were harvested by pelleting at 8,000  $g$  at 4 °C for 10 min in a JLA-10.5 rotor (Beckman, Avanti J-25I). The cell pellet was resuspended to 0.25  $g/\text{mL}$  in LacI Resuspension Buffer (200 mM Tris-HCl, 200 mM KCl, 10 mM  $\text{MgCl}_2$ , 5% (v/v) glycerol, 0.3 mM DTT, 1 mM  $\text{NaN}_3$ , 1 mM PMSF, pH 7.2) and lysed by four passes through a French Press (American Instrument Company). The lysate was mixed with 0.4  $\text{mg}/\text{mL}$  of DNase I for 30 min on ice with constant rocking. The debris was pelleted from the lysate at 39,000  $g$  at 4 °C for 20 min using a JA 25.5 rotor. The crude LacI was precipitated from the supernatant with ~35% ammonium sulfate saturation (confirmed by a 1% SDS-PAGE) at 4 °C, and then spun again for 20 min at 39,000  $g$ . The LacI pellet was resuspended in 20 mL of dialysis buffer (50 mM  $\text{K}_2\text{HPO}_4/\text{KH}_2\text{PO}_4$ , 0.1 mM EDTA, 5% (w/v) glucose, 0.3 mM DTT, 1 mM  $\text{NaN}_3$ , pH 7.2) and dialyzed versus the same buffer overnight at 4 °C using a Slide-A-Lyzer 7K cassette. The dialyzed sample was spun at 39,000  $g$  for 20 min at 4 °C and the supernatant filtered through a 0.2  $\mu\text{m}$  syringe filter (Millipore).

LacI was purified on a Mono S HR 5/5 Column using a GE AKTA FPLC with a 50 mM to 500 mM  $\text{K}_2\text{HPO}_4/\text{KH}_2\text{PO}_4$  (0.1 mM EDTA, 5% (w/v) glucose, 0.3 mM DTT, 1 mM  $\text{NaN}_3$ , pH 7.2), 40-column volume linear gradient and a 1.0 mL/min flow rate. The fractions containing LacI (usually eluting between 250 and 300 mM KCl) were pooled and concentrated (if required) with a Centricon (Amicon, Millipore). Fractions that contain <95% purity (determined from a

1% SDS-PAGE silver staining analysis) were further purified using a Sephadex 300, 2 x 15 cm gel filtration column at 1.0 mL/min flow rate using LacI Storage Buffer (200 mM  $\text{KPO}_4$ , 2 mM EDTA, 400 mM NaCl, 1 mM DTT, 1 mM  $\text{NaN}_3$ , pH 7.2). The concentrated samples were dialyzed against LacI Storage Buffer G (LacI Storage buffer that includes 50% glycerol) with multiple changes at 4 °C overnight.

The concentration of LacI tetramer was determined from the  $A_{280}$  with the extinction coefficient of 22,500 for each monomer in the tetramer with a typical yield of 5 nmol (2 mL of 25  $\mu\text{M}$ ) LacI tetramer per liter of LB. The active protein concentration was determined by EMSA, using 7.5% native acrylamide gels (75:1 acrylamide:*bis*-acrylamide) run at 20 V/cm for 2 hours at 20 °C in TBE buffer. The radiolabeled DNA (14.4 nM) was incubated with [LacI] ranging from 0-32 nM in LacI buffer (25 mM Tris, 100 mM KCl, 5mM  $\text{MgCl}_2$ , 2 mM DTT, 50  $\mu\text{g}/\text{mL}$  BSA, 0.02 % Nonidet P40 (now IGEPAL) detergent, pH 7.8) for 15 min at room temperature before loading into the gel. The fraction of DNA shifting was used to calculate the active LacI concentration relative to the  $A_{280}$ . Radiolabeled constructs were prepared by labeling 100  $\mu\text{M}$  of the  $D_E$  Top (unmodified) primer with 70  $\mu\text{Ci}$   $\gamma$ - $^{32}\text{P}$ -ATP (Perkin-Elmer), following the manufacturer's protocol for T4 polynucleotide kinase (NEB). The primer was separated from radioactive ATP using a P6 column (BioRad). The labeled primer was mixed with the  $A_E$  Bot (unmodified) primer and a radiolabeled 9C14 construct was synthesized following the PCR protocol for externally positioned fluorophores described in Materials and Methods. The labeled product was visualized on a STORM imager and gel purified. The final DNA concentration was determined by scintillation counting (Packard 1600TR) with the specific activity being measured relative to the labeled primer.

#### *Estimation of DNA Labeling Efficiency and Donor Quantum Yield Uncertainties*

Based on the manufacturer's extinction coefficients for the dyes and for each primer, the labeling efficiencies for acceptor ( $f_A$ ) and donor ( $f_D$ ) are each ~100 % for labeling of the primers. However, given the low yields from PCR, then subsequent gel purification, storage, and use of

the doubly-labeled dsDNA, it is difficult to quantify the labeling efficiencies precisely. Due to all of the uncertainties in the labeling efficiencies and the quantum yields of conjugated dyes in the experimental setting, we have not corrected the apparent energy transfer efficiency or calculated inter-fluorophore distances from apparent FRET efficiency. However, since each FPV shared one fluorophore with another FPV, we could measure the differences in the relative labeling efficiencies of  $D_E$  vs.  $D_I$  and  $A_E$  vs.  $A_I$  using the emission spectra for direct excitation of each fluorophore. These measurements were performed on the four FPVs of 9C14 as representative molecules for the four FPV landscapes and applied to the entire landscape, as described in the Materials and Methods. The comparison of relative intensities of  $D_E$  vs.  $D_I$  and  $A_E$  vs.  $A_I$  showed that  $D_E$  had 70 % the labeling efficiency of  $D_I$  and  $A_I$  had 76 % the labeling efficiency of  $A_E$ . Including this correction in the analysis does not change the FRET results significantly and has no effects on our interpretation of loop population distributions. All of the landscape constructs were prepared in parallel using the same labeled primer stocks, and FRET was measured for the entire landscape on the same day, so we believe comparisons of FRET efficiencies within and among the FPV landscapes are robust.

FRET was calculated for donor enhancement and acceptor quenching, and these values are available in the Supplementary Materials in the Microsoft Excel file energy\_transfer.xls. Only acceptor enhancement is reported in work reported in the text, because while changes to donor quantum yield due to LacI and IPTG binding were clearly present, they could not be directly measured for each individual construct. It is apparent in our singly labeled donor-only samples for 9C14 that the addition of LacI has dramatic effects on the quantum yield (Figure S1). We could not distinguish between donor quantum yield changes or energy transfer to an acceptor molecule for a doubly labeled sample in the presence of LacI, LacI + IPTG, or LacI + IPTG + additional LacI. The quenching or enhancement with the addition of LacI observed for each donor position variant was generally consistent on qualitative evaluation of all similar donor position variants. However, a quantitative analysis of donor quenching/enhancement would require singly labeled controls for each FPV and each DNA construct.

Because the acceptor emission for each doubly labeled sample under each experimental condition could be directly measured, we are more confident in these calculated FRET values.

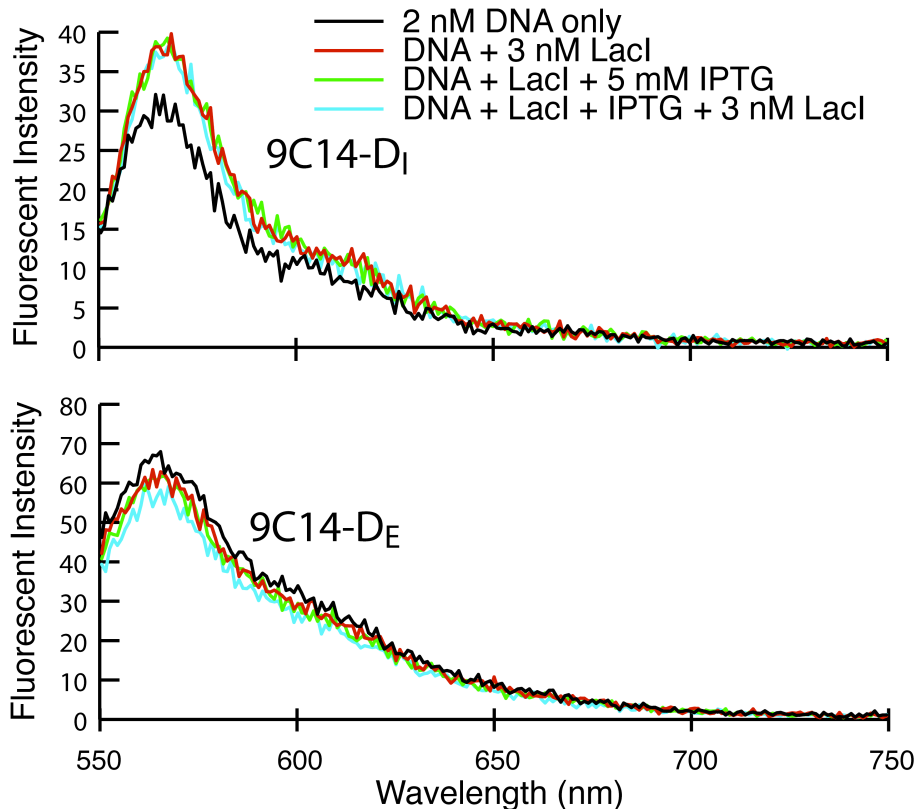

Figure S1. Donor quantum yield effects observed with the addition of LacI and/or IPTG. Singly labeled 9C14 donor only ( $D_I$  and  $D_E$ ) samples were analyzed as described in the Materials and Methods. The addition of LacI had dramatic effects on the quantum yield of the donor in both cases. Presumably these changes in donor yield occur in all FPVs and are most likely caused by changes in the donor environment specific to each LacI•DNA complex. However, to quantitate the affects of donor quantum yield for the environment specific for each individual FPV requires two landscapes of controls for the  $D_I$  and  $D_E$  samples, which would be a total of 50 control samples. Therefore, as discussed in the Materials and Methods the acceptor, whose changes in quantum yield could be directly monitored throughout the experiments, provided a more reliable measurement of FRET seen as acceptor enhancement.

#### *DNA Competition Experiments Demonstrate Stable Low-FRET LacI•DNA Loops*

Competition experiments show that upon challenging loops with excess competitor DNA, after an initial small decrease FRET remains constant for at least 18 hours. The initial decrease is not accompanied by an increase in any other landscape, so we ascribe it to defective DNA or

proteins that form unstable loops as opposed to redistribution among loops. Pre-incubation with competitor gives no FRET, and addition of IPTG causes a rapid decrease in FRET, showing that the observed persistent FRET is due to kinetic stability of the loops, not instrumental artifacts.

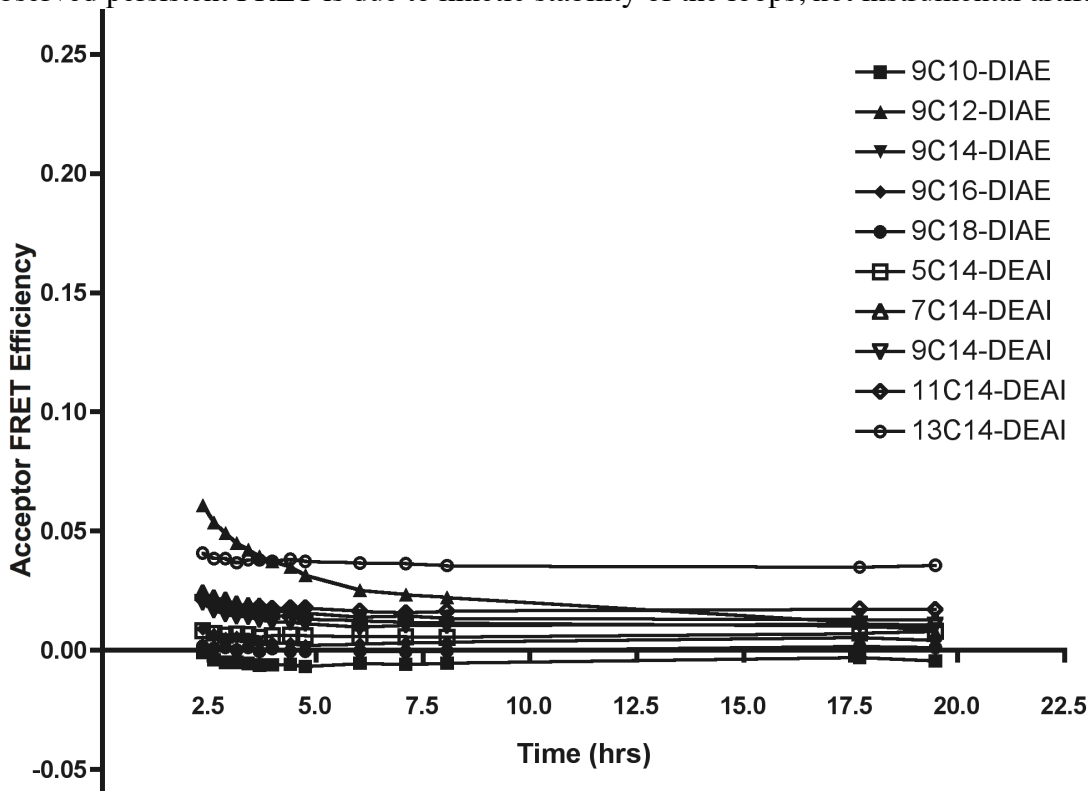

Figure S2. LacI•DNA loops were challenged with excess DNA competitor. The EMSA in Figure 4 of the main text exemplified, using the low-FRET construct 13C10, that low FRET constructs can form stable loops that are resistant to excess DNA competitor. Here we show FRET data for a selection of the landscape for the  $D_{IAE}$  and  $D_{EAI}$  FPVs that were competed with excess unlabeled DNA (10 nM unlabeled DNA construct, for example 9C14- $D_{IAE}$  was competed with unlabeled 9C14, and 9C18-  $D_{IAE}$  was competed with unlabeled 9C18). following a two hour incubation of 2 nM DNA with 3 nM LacI. Acceptor FRET was measured on a Typhoon Imager (3) by exciting the donor (555 nm) and measuring acceptor enhancement (670 nm) as a function of time. FRET was calculated as shown in the Materials and Methods and then analyzed in Prism 4. The low-FRET constructs appear resistant to competitor challenge, suggesting that they are still forming stable loops with long half-lives, as seen with the EMSA studies.

### *Details of DNA Design*

To facilitate modeling efforts or to allow for adapting this sequence landscape to other systems, we provide more details of the construction and all DNA sequences in Figure S3 and Table S1 below.



TABLE S1. DNA Construct Sequence Landscape

| Construct Label | DNA Sequence (between EcoR V sites)                                                                                                                                                                                                      | Center-Center Operator Distance (bp) |
|-----------------|------------------------------------------------------------------------------------------------------------------------------------------------------------------------------------------------------------------------------------------|--------------------------------------|
| 5C10            | ATCTGCAGGTCAGTCTAGGTAATTGTGAGCGCTCACAAATTAGATCTTCGTACGGAT<br>CCGGTTTTTTGCCCCGTTTTTTGCCGTTTTTTGCCCGTTTTTTGCCGTTTTTTGCCG<br>GTTTTTTGCCGTTTTTTGCCCGTTTTTTGCGCTGAACCGGTCCATCGAAGCTAGCT<br>AATTGTGAGCGCTCACAAATTCGTTGTGGTAAAGCTTTGAT          | 148                                  |
| 5C12            | ATCTGCAGGTCAGTCTAGGTAATTGTGAGCGCTCACAAATTAGATCTTCGTACGGAT<br>CCGGTTTTTTGCCCCGTTTTTTGCCGTTTTTTGCCCGTTTTTTGCCGTTTTTTGCCG<br>GTTTTTTGCCGTTTTTTGCCCGTTTTTTGCGCTGAACCGGTCCATCGAAGCTAG<br>CTAATTGTGAGCGCTCACAAATTCGTTGTGGTAAAGCTTTGAT          | 150                                  |
| 5C14            | ATCTGCAGGTCAGTCTAGGTAATTGTGAGCGCTCACAAATTAGATCTTCGTACGGAT<br>CCGGTTTTTTGCCCCGTTTTTTGCCGTTTTTTGCCCGTTTTTTGCCGTTTTTTGCCG<br>GTTTTTTGCCGTTTTTTGCCCGTTTTTTGCGCTGAACCGGTCCATCGAAGCTAG<br>AGCTAATTGTGAGCGCTCACAAATTCGTTGTGGTAAAGCTTTGAT        | 152                                  |
| 5C16            | ATCTGCAGGTCAGTCTAGGTAATTGTGAGCGCTCACAAATTAGATCTTCGTACGGAT<br>CCGGTTTTTTGCCCCGTTTTTTGCCGTTTTTTGCCCGTTTTTTGCCGTTTTTTGCCG<br>GTTTTTTGCCGTTTTTTGCCCGTTTTTTGCGCTGAACCGGTCCATCGAAGCTAG<br>CTAGCTAATTGTGAGCGCTCACAAATTCGTTGTGGTAAAGCTTTGAT      | 154                                  |
| 5C18            | ATCTGCAGGTCAGTCTAGGTAATTGTGAGCGCTCACAAATTAGATCTTCGTACGGAT<br>CCGGTTTTTTGCCCCGTTTTTTGCCGTTTTTTGCCCGTTTTTTGCCGTTTTTTGCCG<br>GTTTTTTGCCGTTTTTTGCCCGTTTTTTGCGCTGAACCGGTCCATCGAAGCTAG<br>AGCTAGCTAATTGTGAGCGCTCACAAATTCGTTGTGGTAAAGCTTTGAT    | 156                                  |
| 7C10            | ATCTGCAGGTCAGTCTAGGTAATTGTGAGCGCTCACAAATTAGATCTTCGTACGG<br>ATCCGGTTTTTTGCCCCGTTTTTTGCCGTTTTTTGCCCGTTTTTTGCCGTTTTTTGC<br>CCGTTTTTTGCCGTTTTTTGCCCGTTTTTTGCGCTGAACCGGTCCATCGAAGCTAG<br>CTAATTGTGAGCGCTCACAAATTCGTTGTGGTAAAGCTTTGAT          | 150                                  |
| 7C12            | ATCTGCAGGTCAGTCTAGGTAATTGTGAGCGCTCACAAATTAGATCTTCGTACGG<br>ATCCGGTTTTTTGCCCCGTTTTTTGCCGTTTTTTGCCCGTTTTTTGCCGTTTTTTGC<br>CCGTTTTTTGCCGTTTTTTGCCCGTTTTTTGCGCTGAACCGGTCCATCGAAGCTAG<br>AGCTAATTGTGAGCGCTCACAAATTCGTTGTGGTAAAGCTTTGAT        | 152                                  |
| 7C14            | ATCTGCAGGTCAGTCTAGGTAATTGTGAGCGCTCACAAATTAGATCTTCGTACGG<br>ATCCGGTTTTTTGCCCCGTTTTTTGCCGTTTTTTGCCCGTTTTTTGCCGTTTTTTGC<br>CCGTTTTTTGCCGTTTTTTGCCCGTTTTTTGCGCTGAACCGGTCCATCGAAGCTAG<br>CTAGCTAATTGTGAGCGCTCACAAATTCGTTGTGGTAAAGCTTTGAT      | 154                                  |
| 7C16            | ATCTGCAGGTCAGTCTAGGTAATTGTGAGCGCTCACAAATTAGATCTTCGTACGG<br>ATCCGGTTTTTTGCCCCGTTTTTTGCCGTTTTTTGCCCGTTTTTTGCCGTTTTTTGC<br>CCGTTTTTTGCCGTTTTTTGCCCGTTTTTTGCGCTGAACCGGTCCATCGAAGCTAG<br>AGCTAGCTAATTGTGAGCGCTCACAAATTCGTTGTGGTAAAGCTTTGAT    | 156                                  |
| 7C18            | ATCTGCAGGTCAGTCTAGGTAATTGTGAGCGCTCACAAATTAGATCTTCGTACGG<br>ATCCGGTTTTTTGCCCCGTTTTTTGCCGTTTTTTGCCCGTTTTTTGCCGTTTTTTGC<br>CCGTTTTTTGCCGTTTTTTGCCCGTTTTTTGCGCTGAACCGGTCCATCGAAGCTATC<br>GAAGCTAGCTAATTGTGAGCGCTCACAAATTCGTTGTGGTAAAGCTTTGAT | 158                                  |
| 9C10            | ATCTGCAGGTCAGTCTAGGTAATTGTGAGCGCTCACAAATTAGATCTCAATTCGTAC<br>GGATCCGGTTTTTTGCCCCGTTTTTTGCCGTTTTTTGCCCGTTTTTTGCCGTTTTTT<br>GCCCGTTTTTTGCCGTTTTTTGCCCGTTTTTTGCGCTGAACCGGTCCATCGAAGCT<br>AGCTAATTGTGAGCGCTCACAAATTCGTTGTGGTAAAGCTTTGAT      | 152                                  |
| 9C12            | ATCTGCAGGTCAGTCTAGGTAATTGTGAGCGCTCACAAATTAGATCTCAATTCGTAC<br>GGATCCGGTTTTTTGCCCCGTTTTTTGCCGTTTTTTGCCCGTTTTTTGCCGTTTTTT<br>GCCCGTTTTTTGCCGTTTTTTGCCCGTTTTTTGCGCTGAACCGGTCCATCGAAG<br>CTAGCTAATTGTGAGCGCTCACAAATTCGTTGTGGTAAAGCTTTGAT      | 154                                  |
| 9C14            | ATCTGCAGGTCAGTCTAGGTAATTGTGAGCGCTCACAAATTAGATCTCAATTCGTAC<br>GGATCCGGTTTTTTGCCCCGTTTTTTGCCGTTTTTTGCCCGTTTTTTGCCGTTTTTT<br>GCCCGTTTTTTGCCGTTTTTTGCCCGTTTTTTGCGCTGAACCGGTCCATCGAAGCT<br>AGCTAGCTAATTGTGAGCGCTCACAAATTCGTTGTGGTAAAGCTTTGAT  | 156                                  |

TABLE S1. DNA Construct Sequence Landscape (continued)

| Construct Label | DNA Sequence (between EcoR V sites)                                                                                                                                                                                                         | Center-Center Operator Distance (bp) |
|-----------------|---------------------------------------------------------------------------------------------------------------------------------------------------------------------------------------------------------------------------------------------|--------------------------------------|
| 9C16            | ATCTGCAGGTCAGTCTAGGTAATTGTGAGCGCTCACAAATTAGATCTCAATTCGTAC<br>GGATCCGGTTTTTTGCCCCTTTTTGCCCCTTTTTGCCCCTTTTTGCCCCTTTTT<br>GCCCCTTTTTGCCCCTTTTTGCCCCTTTTTGCGCTGAACCGCTCCTAGACGATC<br>GAAGCTAGCTAATTGTGAGCGCTCACAAATTCGTTGTGGTAAAGCTTTGAT        | 158                                  |
| 9C18            | ATCTGCAGGTCAGTCTAGGTAATTGTGAGCGCTCACAAATTAGATCTCAATTCGTAC<br>GGATCCGGTTTTTTGCCCCTTTTTGCCCCTTTTTGCCCCTTTTTGCCCCTTTTT<br>GCCCCTTTTTGCCCCTTTTTGCCCCTTTTTGCGCTGAACCGCTCCTAGACGCTA<br>TCGAAGCTAGCTAATTGTGAGCGCTCACAAATTCGTTGTGGTAAAGCTTTGAT      | 160                                  |
| 11C10           | ATCTGCAGGTCAGTCTAGGTAATTGTGAGCGCTCACAAATTAGATCTCAGATCTCGT<br>ACGGATCCGGTTTTTTGCCCCTTTTTGCCCCTTTTTGCCCCTTTTTGCCCCTTTTT<br>TTGCCCTTTTTGCCCCTTTTTGCCCCTTTTTGCGCTGAACCGCTCCATCGAAG<br>CTAGCTAATTGTGAGCGCTCACAAATTCGTTGTGGTAAAGCTTTGAT           | 154                                  |
| 11C12           | ATCTGCAGGTCAGTCTAGGTAATTGTGAGCGCTCACAAATTAGATCTCAGATCTCGT<br>ACGGATCCGGTTTTTTGCCCCTTTTTGCCCCTTTTTGCCCCTTTTTGCCCCTTTTT<br>TTGCCCTTTTTGCCCCTTTTTGCCCCTTTTTGCGCTGAACCGCTCCTAATCGA<br>AGCTAGCTAATTGTGAGCGCTCACAAATTCGTTGTGGTAAAGCTTTGAT         | 156                                  |
| 11C14           | ATCTGCAGGTCAGTCTAGGTAATTGTGAGCGCTCACAAATTAGATCTCAGATCTCGT<br>ACGGATCCGGTTTTTTGCCCCTTTTTGCCCCTTTTTGCCCCTTTTTGCCCCTTTTT<br>TTGCCCTTTTTGCCCCTTTTTGCCCCTTTTTGCGCTGAACCGCTCCTAGAATC<br>TAAGCTAGCTAATTGTGAGCGCTCACAAATTCGTTGTGGTAAAGCTTTGAT       | 158                                  |
| 11C16           | ATCTGCAGGTCAGTCTAGGTAATTGTGAGCGCTCACAAATTAGATCTCAGATCTCGT<br>ACGGATCCGGTTTTTTGCCCCTTTTTGCCCCTTTTTGCCCCTTTTTGCCCCTTTTT<br>TTGCCCTTTTTGCCCCTTTTTGCCCCTTTTTGCGCTGAACCGCTCCTAGACGA<br>TCGAAGCTAGCTAATTGTGAGCGCTCACAAATTCGTTGTGGTAAAGCTTTGAT     | 160                                  |
| 11C18           | ATCTGCAGGTCAGTCTAGGTAATTGTGAGCGCTCACAAATTAGATCTCAGATCTCGT<br>ACGGATCCGGTTTTTTGCCCCTTTTTGCCCCTTTTTGCCCCTTTTTGCCCCTTTTT<br>TTGCCCTTTTTGCCCCTTTTTGCCCCTTTTTGCGCTGAACCGCTCCTAGACGC<br>TATCGAAGCTAGCTAATTGTGAGCGCTCACAAATTCGTTGTGGTAAAGCTTTGAT   | 162                                  |
| 13C10           | ATCTGCAGGTCAGTCTAGGTAATTGTGAGCGCTCACAAATTAGATCTCAGATCTCGT<br>CGACGGATCCGGTTTTTTGCCCCTTTTTGCCCCTTTTTGCCCCTTTTTGCCCCTTT<br>TTTTGCCCTTTTTGCCCCTTTTTGCCCCTTTTTGCGCTGAACCGCTCCATCGA<br>AGCTAGCTAATTGTGAGCGCTCACAAATTCGTTGTGGTAAAGCTTTGAT         | 156                                  |
| 13C12           | ATCTGCAGGTCAGTCTAGGTAATTGTGAGCGCTCACAAATTAGATCTCAGATCTCGT<br>CGACGGATCCGGTTTTTTGCCCCTTTTTGCCCCTTTTTGCCCCTTTTTGCCCCTTT<br>TTTTGCCCTTTTTGCCCCTTTTTGCCCCTTTTTGCGCTGAACCGCTCCTAATC<br>GAAGCTAGCTAATTGTGAGCGCTCACAAATTCGTTGTGGTAAAGCTTTGAT       | 158                                  |
| 13C14           | ATCTGCAGGTCAGTCTAGGTAATTGTGAGCGCTCACAAATTAGATCTCAGATCTCGT<br>CGACGGATCCGGTTTTTTGCCCCTTTTTGCCCCTTTTTGCCCCTTTTTGCCCCTTT<br>TTTTGCCCTTTTTGCCCCTTTTTGCCCCTTTTTGCGCTGAACCGCTCCTAGAA<br>TCGAAGCTAGCTAATTGTGAGCGCTCACAAATTCGTTGTGGTAAAGCTTTGAT     | 160                                  |
| 13C16           | ATCTGCAGGTCAGTCTAGGTAATTGTGAGCGCTCACAAATTAGATCTCAGATCTCGT<br>CGACGGATCCGGTTTTTTGCCCCTTTTTGCCCCTTTTTGCCCCTTTTTGCCCCTTT<br>TTTTGCCCTTTTTGCCCCTTTTTGCCCCTTTTTGCGCTGAACCGCTCCTAGAC<br>GATCGAAGCTAGCTAATTGTGAGCGCTCACAAATTCGTTGTGGTAAAGCTTTGAT   | 162                                  |
| 13C18           | ATCTGCAGGTCAGTCTAGGTAATTGTGAGCGCTCACAAATTAGATCTCAGATCTCGT<br>CGACGGATCCGGTTTTTTGCCCCTTTTTGCCCCTTTTTGCCCCTTTTTGCCCCTTT<br>TTTTGCCCTTTTTGCCCCTTTTTGCCCCTTTTTGCGCTGAACCGCTCCTAGAC<br>GCTATCGAAGCTAGCTAATTGTGAGCGCTCACAAATTCGTTGTGGTAAAGCTTTGAT | 164                                  |



## References

1. Wilson, C.J., Das, P., Clementi, C., Matthews, K.S. and Wittung-Stafshede, P. (2005) The experimental folding landscape of monomeric Lactose repressor, a large two-domain protein, involves two kinetic intermediates. *Proc. Natl. Acad. Sci. USA*, **102**, 14563-14568.
2. Brenowitz, M., Mandal, N., Pickar, A., Jamison, E. and Adhya, S. (1991) DNA-binding properties of a Lac repressor mutant incapable of forming tetramers. *J. Biol. Chem.*, **266**, 1281-1288.
3. Hieb, A.R., Halsey, W.A., Betterton, M.D., Perkins, T.T., Kugel, J.F. and Goodrich, J.A. (2007) TFIIA changes the conformation of the DNA in TBP/TATA complexes and increases their kinetic stability. *J. Mol. Biol.*, **372**, 619-632.

All of these references are also found in the reference list of the main text.
